# Supplementary figures and images for: Nicotinamide adenine dinucleotide is transported into mammalian mitochondria
Source: eLife journal article supplement (doi:10.7554/elife.33246), 2018-06-11

Figure 5 - figure supplement 1

**A**

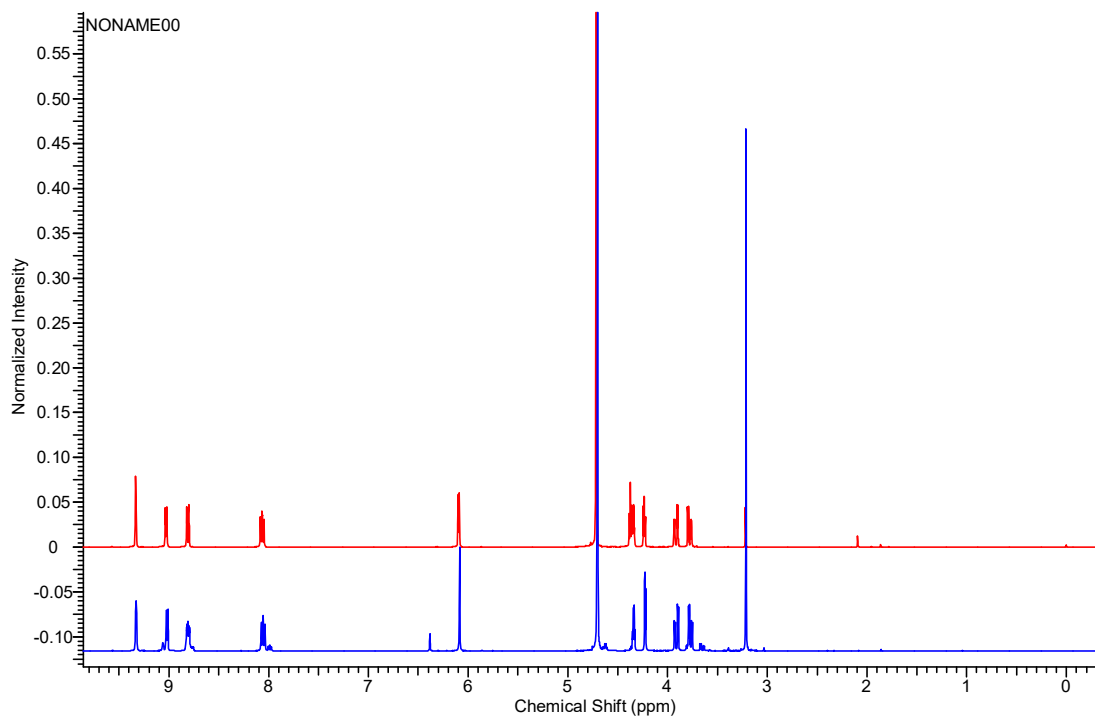

**B**

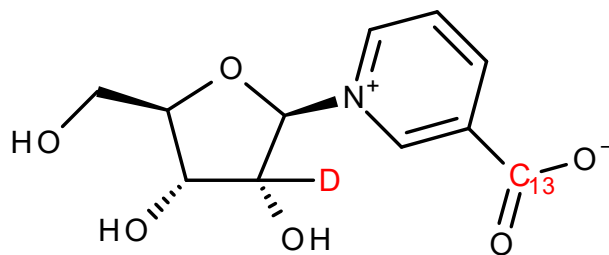

Supplement: supp [file elife-33246-supp-v1.zip]

Figure 6 - figure supplement 5

**A**

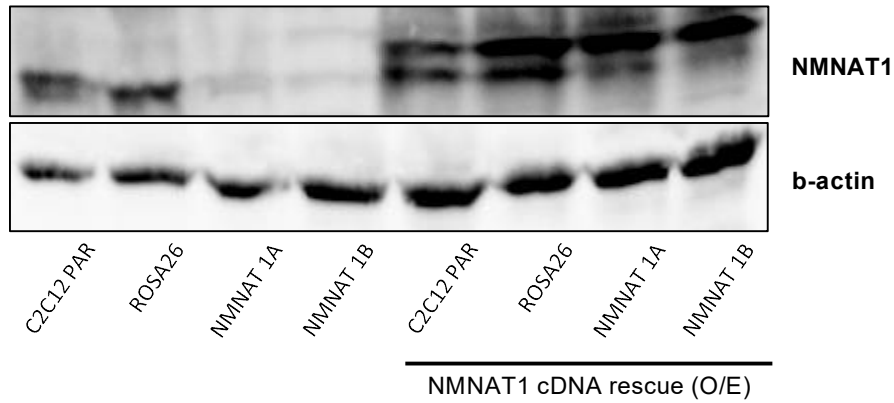

**B**

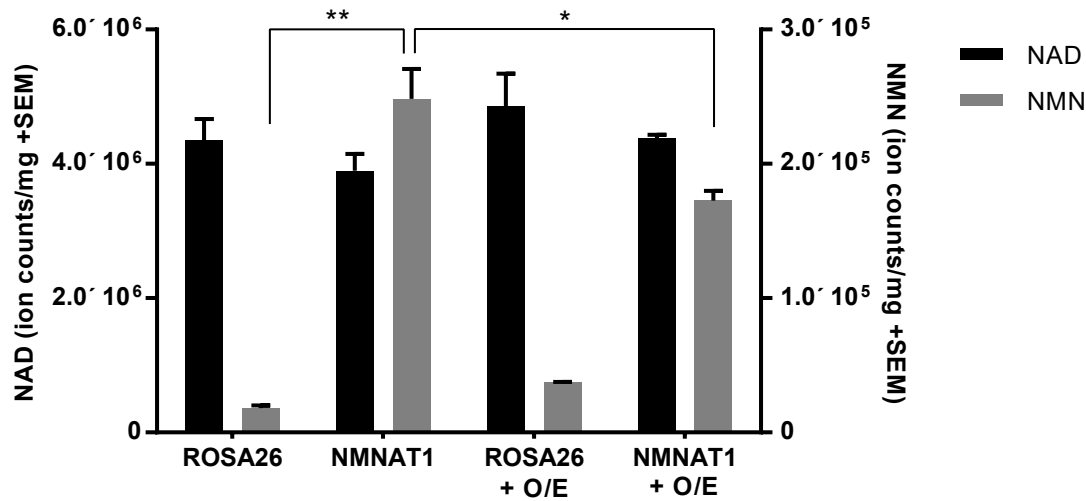

**C**

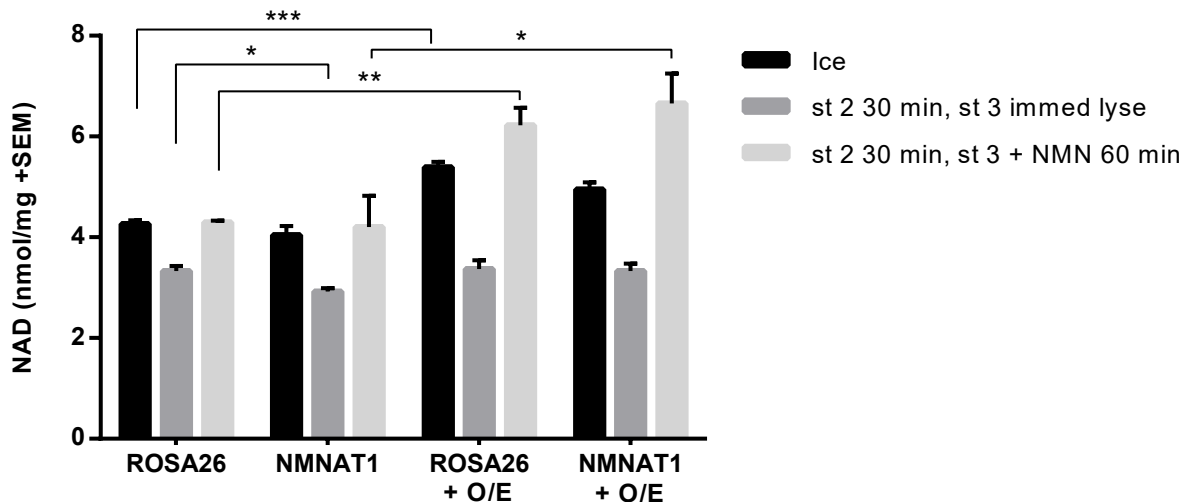

Supplement: supp [file elife-33246-supp-v1.zip]

Figure 6 - figure supplement 2

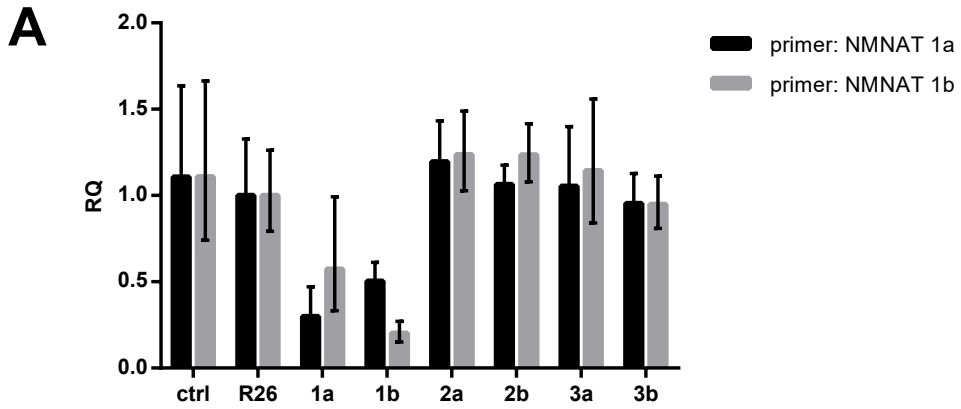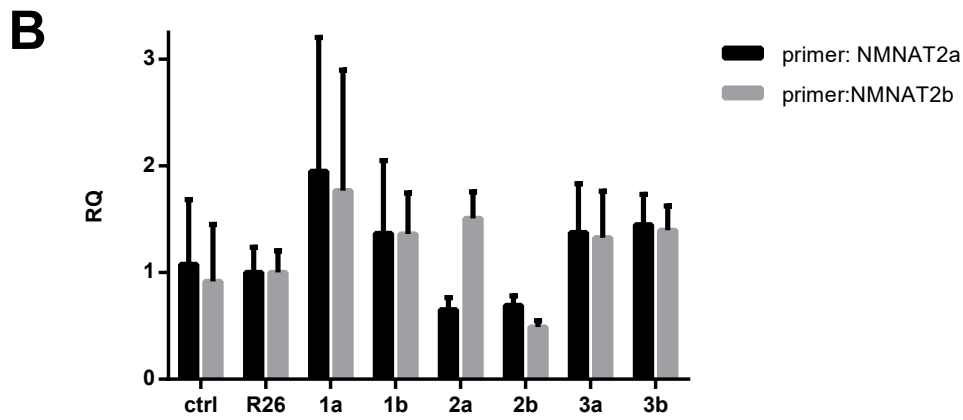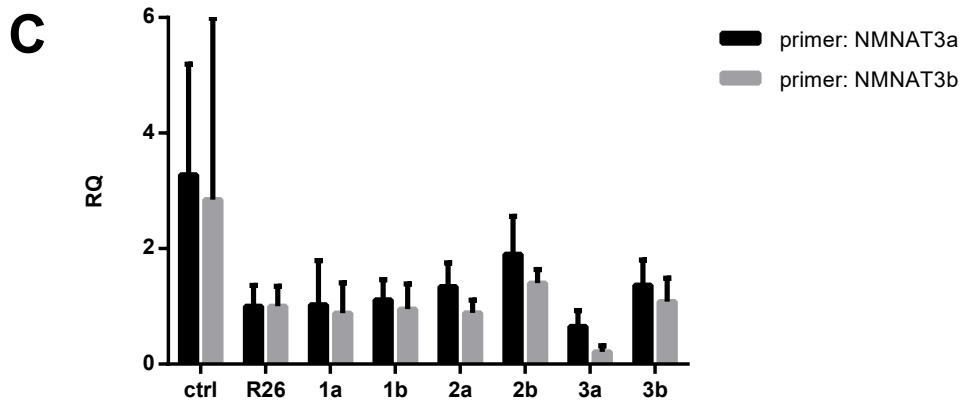

Supplement: supp [file elife-33246-supp-v1.zip]

# Figure 6 - figure supplement 4

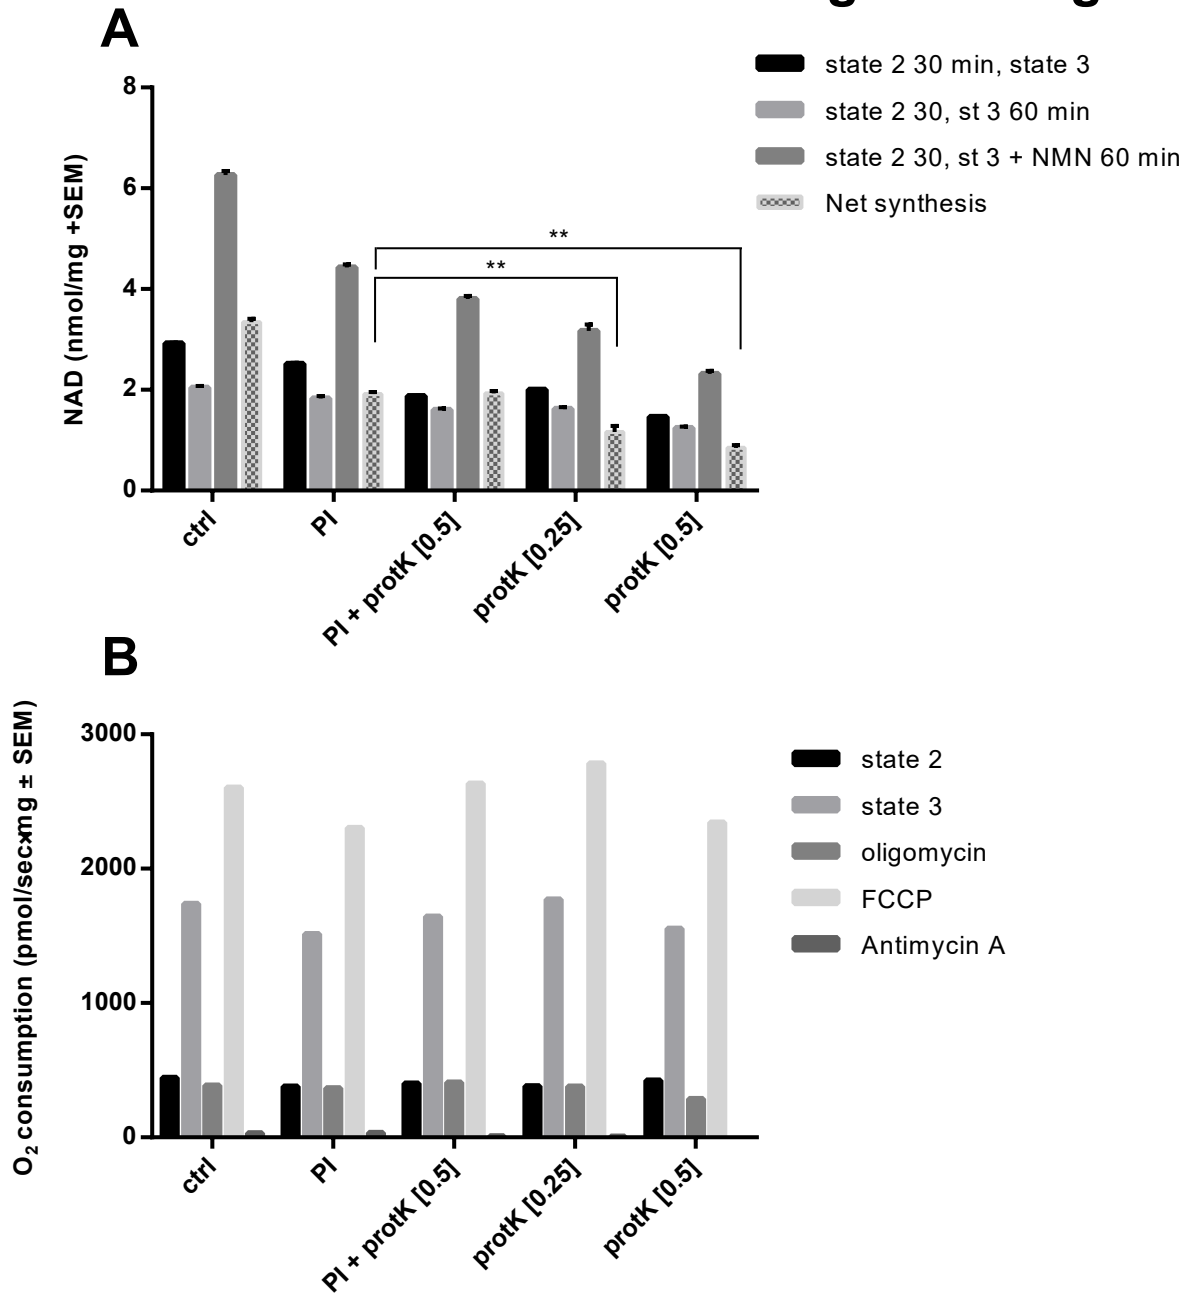

Supplement: supp [file elife-33246-supp-v1.zip]
